# Supplementary material for: Highly variable response of hard coral taxa to successive coral bleaching events (2019-2020) and rising ocean temperatures in Northeast Peninsular Malaysia
Source: bioRxiv or medRxiv preprint supplement (doi:10.1101/2021.11.16.468775), 2022-03-01
Supplement: Supplementary file [file media-1.pdf]

**Supplementary S1** | List of anthozoan taxa observed bleached off-transect during surveys in June 2019 in Pulau Lang Tengah in Northeast Peninsular Malaysia.

| <b>Non-scleractinian</b> | <b>Common name</b>        | <b>Species name</b>                                    |
|--------------------------|---------------------------|--------------------------------------------------------|
| Anemone                  | Magnificent Anemone       | <i>Heteractis magnifica</i> ; <i>Heteractis crispa</i> |
| Anemone                  | Bubble Tip Anemone        | <i>Entacmaea quadricolor</i>                           |
| Anemone                  | Carpet Anemone            | <i>Stichodactyla gigantea</i>                          |
| Fire Coral               | -                         | <i>Millepora cataphyllia</i>                           |
| Soft Coral               | -                         | <i>Sarcophyton spp.</i>                                |
| Soft Coral               | -                         | <i>Sinularia spp.</i>                                  |
| Zoanthid                 | -                         | <i>Palythoa tuberculosa</i>                            |
| <b>Scleractinian</b>     | <b>Colony growth form</b> | <b>Species name</b>                                    |
| <i>Alveopora</i>         | Submassive                | <i>A. allingi</i>                                      |
| <i>Alveopora</i>         | Submassive                | <i>A. catalai</i>                                      |
| <i>Alveopora</i>         | Submassive                | <i>A. gigas</i>                                        |
| <i>Astrea</i>            | Submassive                | <i>A. curta</i>                                        |
| <i>Astrea</i>            | Submassive                | <i>A. annuligrea</i>                                   |
| <i>Cycloseris</i>        | Solitary                  | <i>Cycloseris spp.</i>                                 |
| <i>Ctenactis</i>         | Solitary                  | <i>C. albitentaculata</i>                              |
| <i>Ctenactis</i>         | Solitary                  | <i>C. crassa</i>                                       |
| <i>Ctenactis</i>         | Solitary                  | <i>C. echinata</i>                                     |
| <i>Gardineroseris</i>    | Submassive                | <i>G. Planulata</i>                                    |
| <i>Leptoseris</i>        | Encrusting (plate)        | <i>L. scabra</i>                                       |
| <i>Lithophyllon</i>      | Encrusting (plate)        | <i>L. undulatum</i>                                    |
| <i>Montipora</i>         | Encrusing with upgrowth   | <i>M. hispida</i>                                      |
| <i>Phymastrea</i>        | Submassive                | <i>P. valenciennesi</i>                                |
| <i>Porites</i>           | Branching                 | <i>P. cylindrica</i>                                   |
| <i>Psammocora</i>        | Columnar                  | <i>P. digitata</i>                                     |

**Supplementary S2** | Mean annual sea surface temperature (SST°C) and mean bleaching season (April-September) sea surface temperatures of the 10 warmest years since 1985 are shown for Pulau Lang Tengah, Northeast Peninsular Malaysia. SST was recorded by the National Oceanic and Atmospheric Association (NOAA), Coral Reef Watch (CRW) product, version 3.1, 2014.

| Year | Annual mean SST (°C) | Year | Bleaching season mean SST (°C) |
|------|----------------------|------|--------------------------------|
| 2010 | 29.65                | 2010 | 30.38                          |
| 2016 | 29.51                | 2020 | 30.24                          |
| 1998 | 29.48                | 1998 | 30.13                          |
| 2020 | 29.47                | 2019 | 30.12                          |
| 2019 | 29.45                | 2014 | 30.1                           |
| 2017 | 29.39                | 2016 | 30.09                          |
| 2018 | 29.25                | 2017 | 30.02                          |
| 2013 | 29.19                | 2013 | 29.97                          |
| 2014 | 29.19                | 2006 | 29.93                          |
| 2012 | 29.18                | 2009 | 29.89                          |

**Supplementary S3** | Summary of recorded thermal stress (DHW °C –weeks) in 2019 and 2020 at numerous locations across the eastern coast of Peninsular Malaysia. Heat stress was recorded by the National Oceanic and Atmospheric Association (NOAA), Coral Reef Watch (CRW) product, version 3.1, 2014.

| Location          | Coordinates                | DHW 2019 | DHW 2020 | Peak DHW 2019 | Peak DHW 2020 |
|-------------------|----------------------------|----------|----------|---------------|---------------|
| Pulau Perhentian  | 5°56'02.5"N, 102°43'51.5"E | 2.00     | 0.15     | 01.06.2019    | 31.05.2020    |
| Pulau Lang Tengah | 5°46'30.0"N, 102°52'30.0"E | 1.05     | 0.00     | 01.06.2019    | -             |
| Pulau Yu Kecil    | 5°37'28.3"N, 103°09'38.4"E | 2.53     | 0.00     | 01.06.2019    | -             |
| Pulau Tenggol     | 4°48'14.1"N, 103°40'46.5"E | 2.65     | 0.47     | 12.05.2019    | 22.05.2020    |
| Pulau Tioman      | 2°47'58.6"N, 104°10'09.5"E | 1.74     | 0.49     | 09.05.2019    | 22.05.2020    |
| Pulau Sibul       | 2°13'14.7"N, 104°03'16.7"E | 4.61     | 1.90     | 15.05.2019    | 21.05.2020    |

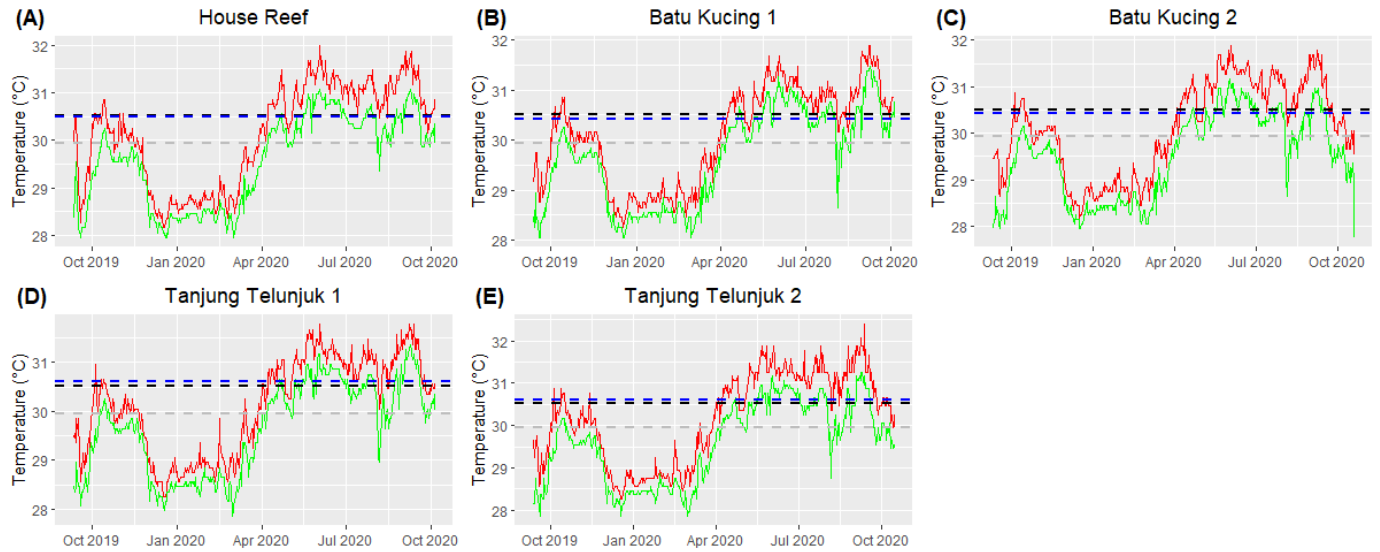

**Supplementary S4** Mean *in-situ* temperature measurements around Pulau Lang Tengah, Northeast Peninsular Malaysia, are shown for each recording station at 8 meters water depth. Mean maximum temperature is shown in red, and mean minimum temperature is shown in green. The grey dotted line represents the maximum monthly mean (MMM=29.94°C) based on historical satellite measurements by the National Oceanic and Atmospheric Association (NOAA), Coral Reef Watch (CRW), version 3.1 (2014), and the black line represents the established *in-situ* MMM (30.51°C) of Pulau Lang Tengah after interpolating satellite data with *in-situ* measurements. The blue dotted line presents the established site-specific *in-situ* MMM after interpolating satellite data with site-specific *in-situ* measurements (MMM HR=30.50°C, MMM BK=30.42°C, MMM TT=30.60°C).

**Supplementary S5** | General table showing the taxon-specific bleaching (BI) and bleaching induced mortality index (BIMI). The percentage of partial and whole-colony mortality of scleractinian taxa is shown during successive bleaching events in June 2019 and June 2020 in Pulau Lang Tengah, Northeast Peninsular Malaysia.

| <i>Genus</i>        | <i>Morphology</i> | <b>June 2019</b>    |           | <b>October 2019</b> |                 |             | <b>June 2020</b>    |           |
|---------------------|-------------------|---------------------|-----------|---------------------|-----------------|-------------|---------------------|-----------|
|                     |                   | <b>n (colonies)</b> | <b>BI</b> | <b>n (colonies)</b> | <b>Dead (%)</b> | <b>BIMI</b> | <b>n (colonies)</b> | <b>BI</b> |
| <i>Acropora</i>     | Arborescent       | 26                  | 3.0       | 17                  | 5.9             | 0.25        | 15                  | 0.0       |
|                     | Corymbose         | 32                  | 1.6       | 25                  | 0.0             | 0.00        | 33                  | 2.6       |
|                     | Digitate          | 9                   | 0.8       | 12                  | 0.0             | 0.00        | 11                  | 0.0       |
|                     | Hispidose         | 143                 | 37.4      | 100                 | 0.0             | 0.00        | 102                 | 0.0       |
|                     | Tabular           | 10                  | 1.4       | 4                   | 25.0            | 0.50        | 11                  | 0.0       |
| <i>Astreopora</i>   | Massive           | 1                   | 0.4       | 1                   | 0.0             | 0.00        | 2                   | 0.4       |
|                     | Encrusting        | 1                   | 1.0       | 1                   | 0.0             | 0.00        | 0                   | 0.0       |
| <i>Blasstomussa</i> | Encrusting        | 0                   | 0.0       | 1                   | 0.0             | 0.00        | 3                   | 0.0       |
| <i>Cyphastrea</i>   | Encrusting        | 19                  | 11.4      | 25                  | 0.0             | 0.00        | 22                  | 1.8       |
| <i>Diploastrea</i>  | Encrusting        | 2                   | 0.2       | 2                   | 0.0             | 0.00        | 2                   | 0.2       |
| <i>Echinopora</i>   | Branching         | 19                  | 16.4      | 11                  | 0.0             | 0.00        | 7                   | 1.0       |
|                     | Encrusting        | 15                  | 2.6       | 14                  | 7.1             | 0.50        | 17                  | 0.0       |
| <i>Favia</i>        | Encrusting        | 11                  | 0.0       | 17                  | 0.0             | 0.00        | 31                  | 0.8       |
|                     | Submassive        | 47                  | 11.2      | 74                  | 2.7             | 0.50        | 76                  | 2.8       |
|                     | Massive           | 3                   | 1.6       | 5                   | 40.0            | 0.75        | 7                   | 1.2       |
| <i>Favites</i>      | Encrusting        | 48                  | 16.4      | 35                  | 2.9             | 0.25        | 35                  | 2.6       |
| <i>Fungia</i>       | Solitary          | 115                 | 45.2      | 120                 | 0.8             | 0.50        | 137                 | 12.0      |
| <i>Galaxea</i>      | Encrusting        | 96                  | 1.6       | 110                 | 0.0             | 0.00        | 101                 | 4.8       |
| <i>Goniastrea</i>   | Submassive        | 52                  | 34.2      | 61                  | 0.0             | 0.00        | 44                  | 6.6       |
| <i>Goniopora</i>    | Submassive        | 0                   | 0.0       | 4                   | 0.0             | 0.00        | 3                   | 0.0       |
| <i>Herpolitha</i>   | Solitary          | 2                   | 1.2       | 4                   | 0.0             | 0.00        | 1                   | 0.0       |
| <i>Heliopora</i>    | Columnar          | 122                 | 100.4     | 99                  | 14.1            | 11.25       | 92                  | 37.6      |
| <i>Hydnophora</i>   | Branching         | 1                   | 0.4       | 1                   | 0.0             | 0.00        | 1                   | 0.0       |
|                     | Encrusting        | 6                   | 2.4       | 7                   | 0.0             | 0.00        | 6                   | 0.6       |
| <i>Leptastrea</i>   | Encrusting        | 69                  | 4.6       | 72                  | 0.0             | 0.00        | 80                  | 6.8       |
| <i>Leptoria</i>     | Submassive        | 2                   | 0.0       | 1                   | 0.0             | 0.00        | 1                   | 0.0       |
| <i>Merulina</i>     | Encrusting        | 7                   | 2.2       | 6                   | 0.0             | 0.00        | 5                   | 0.0       |
| <i>Montipora</i>    | Encrusting        | 15                  | 4.4       | 8                   | 0.0             | 0.00        | 7                   | 0.6       |
|                     | Vase              | 36                  | 5.2       | 32                  | 6.3             | 1.25        | 37                  | 1.0       |
| <i>Oulophyllia</i>  | Massive           | 5                   | 0.6       | 2                   | 0.0             | 0.00        | 3                   | 0.0       |
| <i>Pachyseris</i>   | Encrusting        | 3                   | 2.0       | 2                   | 0.0             | 0.00        | 1                   | 0.0       |
| <i>Pavona</i>       | Encrusting        | 9                   | 0.0       | 11                  | 0.0             | 0.00        | 7                   | 0.0       |
|                     | Foliose           | 135                 | 84.4      | 114                 | 4.4             | 2.25        | 123                 | 33.2      |
| <i>Physogyra</i>    | Submassive        | 1                   | 0.0       | 7                   | 0.0             | 0.00        | 5                   | 0.0       |
| <i>Platygyra</i>    | Encrusting        | 12                  | 1.2       | 17                  | 5.9             | 0.25        | 23                  | 3.6       |
|                     | Submassive        | 56                  | 17.4      | 78                  | 2.6             | 1.25        | 80                  | 15.6      |

|                       |            |             |              |             |            |              |             |              |
|-----------------------|------------|-------------|--------------|-------------|------------|--------------|-------------|--------------|
| <i>Pocillopora</i>    | Corymbose  | 29          | 11.6         | 31          | 6.5        | 1.5          | 38          | 5.6          |
| <i>Porites</i>        | Encrusting | 47          | 24.6         | 68          | 1.5        | 1.00         | 76          | 7.6          |
| <i>Porites 2</i>      | Encrusting | 447         | 152.8        | 384         | 1.3        | 3.00         | 354         | 42.4         |
| <i>Porites</i>        | Massive    | 155         | 82.0         | 164         | 6.7        | 5.25         | 189         | 38.8         |
| <i>Psammocora</i>     | Encrusting | 18          | 0.6          | 16          | 0.0        | 0.00         | 22          | 0.0          |
|                       | Foliose    | 24          | 0.2          | 29          | 0.0        | 0.00         | 26          | 0.0          |
| <i>Sandolitha</i>     | Solitary   | 1           | 0.2          | 3           | 0.0        | 0.00         | 3           | 0.0          |
| <i>Stylocoenellia</i> | Cryptic    | 5           | 0.0          | 0           | 0.0        | 0.00         | 6           | 0.0          |
| <i>Symphyllia</i>     | Submassive | 26          | 1.6          | 31          | 3.2        | 1.00         | 34          | 1.4          |
| <b>Total</b>          |            | <b>1882</b> | <b>686.4</b> | <b>1826</b> | <b>2.9</b> | <b>31.25</b> | <b>1885</b> | <b>231.6</b> |

**Supplementary S6** | Comparison of bleaching incidence and mortality of hard corals in Pulau Tioman in 2010 [as recorded by Guest et al. (2012)] and Pulau Lang Tengah in 2019. Mortality incidence for Lang Tengah Island was recorded in October 2019. For surveys in Pulau Lang Tengah, moderate bleaching includes categories pale live and fluorescent (B2), and colonies with  $\leq 66\%$  of surface area bleached (B3 and B4). Severe bleaching includes all colonies with  $>66\%$  of the colony surface area bleached (categories B5-B6).

| Genus               | Pulau Tioman 2010 (Guest et al. 2012) |            |              |            |          | Pulau Lang Tengah 2019 |            |              |            |          |
|---------------------|---------------------------------------|------------|--------------|------------|----------|------------------------|------------|--------------|------------|----------|
|                     | n                                     | Normal (%) | Moderate (%) | Severe (%) | Dead (%) | n                      | Normal (%) | Moderate (%) | Severe (%) | Dead (%) |
| <i>Acropora</i>     | 632                                   | 70         | 3            | 1          | 26       | 220                    | 30         | 67           | 3          | 1        |
| <i>Pocillopora</i>  | 87                                    | 39         | 21           | 2          | 38       | 29                     | 38         | 28           | 34         | 7        |
| <i>Hydnophora</i>   | 32                                    | 3          | 3            | 41         | 53       | 7                      | 29         | 43           | 29         | 0        |
| <i>Echinopora</i>   | 8                                     | 100        | 0            | 0          | 0        | 34                     | 35         | 12           | 53         | 4        |
| <i>Favites</i>      | 53                                    | 91         | 9            | 0          | 0        | 48                     | 37         | 29           | 34         | 3        |
| <i>Symphyllia</i>   | 7                                     | 86         | 14           | 0          | 0        | 26                     | 69         | 31           | 0          | 0        |
| <i>Platygyra</i>    | 43                                    | 86         | 9            | 2          | 2        | 68                     | 25         | 62           | 13         | 0        |
| <i>Galaxea</i>      | 56                                    | 91         | 7            | 2          | 0        | 96                     | 92         | 8            | 0          | 0        |
| <i>Favia</i>        | 19                                    | 100        | 0            | 0          | 0        | 61                     | 66         | 18           | 16         | 0        |
| <i>Fungia</i>       | 128                                   | 54         | 38           | 5          | 4        | 115                    | 17         | 58           | 25         | 1        |
| <i>Pavona</i>       | 6                                     | 17         | 0            | 67         | 17       | 144                    | 38         | 5            | 57         | 4        |
| <i>Goniastrea</i>   | 71                                    | 90         | 6            | 0          | 4        | 52                     | 29         | 6            | 65         | 0        |
| <i>Cyphastrea</i>   | 15                                    | 87         | 13           | 0          | 0        | 19                     | 32         | 16           | 53         | 0        |
| <i>Montipora</i>    | 418                                   | 78         | 4            | 0          | 17       | 51                     | 65         | 24           | 12         | 5        |
| <i>Porites 1 +2</i> | 86                                    | 74         | 23           | 2          | 0        | 649                    | 46         | 18           | 36         | 3        |

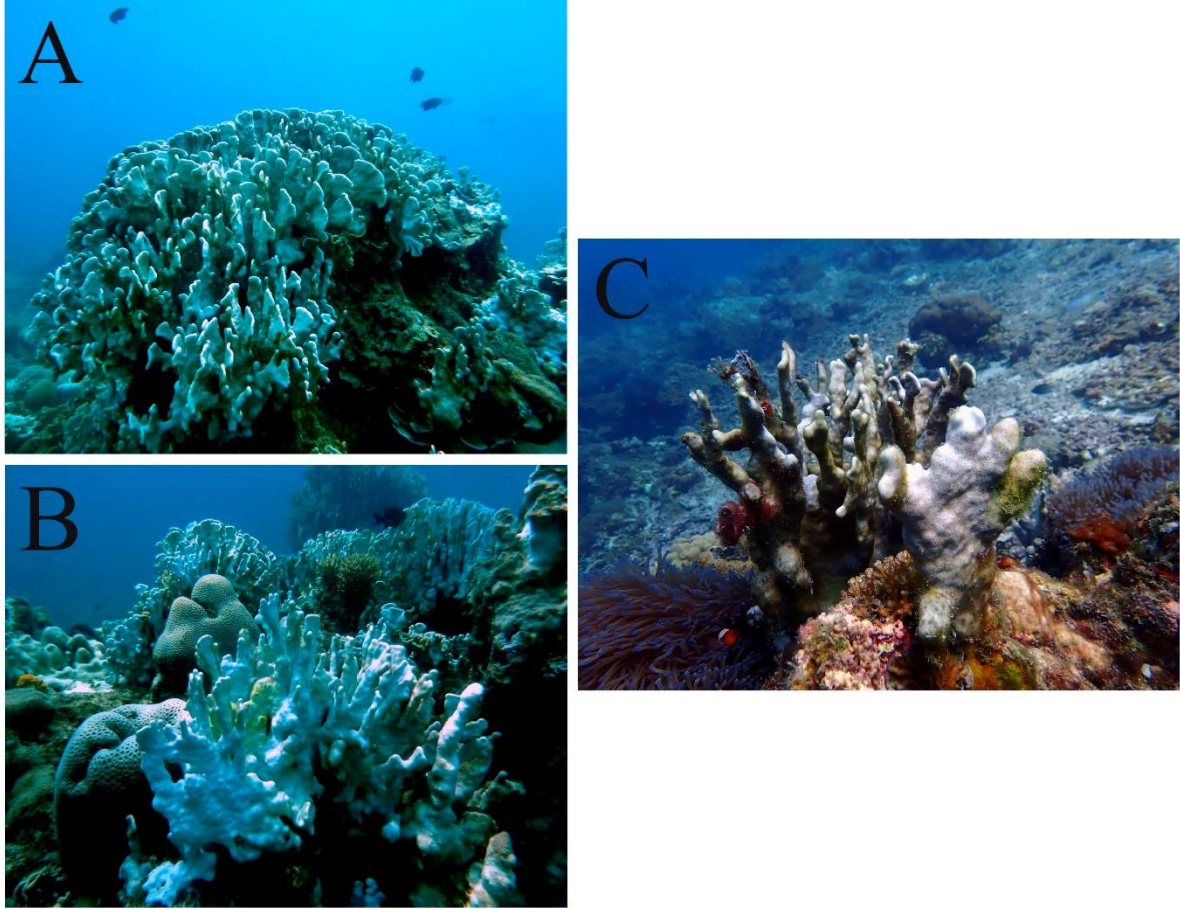

**Supplementary Figure S7** | High bleaching incidence and severity of *Heliopora* sp. colonies was recorded in June 2019 and June 2020 around Pulau Lang Tengah in Northeast Peninsular Malaysia: (A) shows a large *Heliopora* sp. colony on a shallow (5-6 m) fringing reef; (B) highlights high bleaching incidence of *Heliopora* sp. at windward sites and subsequent partial mortality of individual colonies (C).
